# Supplementary material
Source: PubMed Central journal article supplement (PMC9529801)
Supplement: NIHMS1827831-supplement-Supplemental_Figures_and_Tables.pdf [file NIHMS1827831-supplement-Supplemental_Figures_and_Tables.pdf]

## SUPPLEMENTAL MATERIAL

### **Plasma Cell-free DNA Predicts Survival and Maps Specific Sources of Injury in Pulmonary Arterial Hypertension**

Samuel B Brusca, MD,<sup>1,2</sup> Jason M Elinoff, MD,<sup>1</sup> Yvette Zou, MD,<sup>1</sup> Moon K Jang, PhD,<sup>3,4</sup>  
Hyesik Kong, PhD,<sup>3,4</sup> Cumhuri Y Demirkale, PhD,<sup>1</sup> Junfeng Sun, PhD,<sup>1</sup> Fayaz Seifuddin, PhD,<sup>3</sup>  
Mehdi Pirooznia, MD, PhD,<sup>3</sup> Hannah A Valantine, MD, PhD,<sup>4,5</sup> Carl Tanba, MD,<sup>6</sup> Abhishek  
Chaturvedi, MBBS,<sup>7</sup> Grace M Graninger, BSN,<sup>1</sup> Bonnie Harper, BSN,<sup>1</sup> Li-Yuan Chen, PhD,<sup>1</sup>  
Justine Cole, MBChB, MMed,<sup>8</sup> Manreet Kanwar, MD,<sup>9</sup> Raymond L Benza, MD,<sup>10</sup> Ioana R  
Preston, MD,<sup>6</sup> Sean Agbor-Enoh, MD, PhD,<sup>\*3,4,11</sup> Michael A Solomon, MD, MBA<sup>\*1,12</sup>

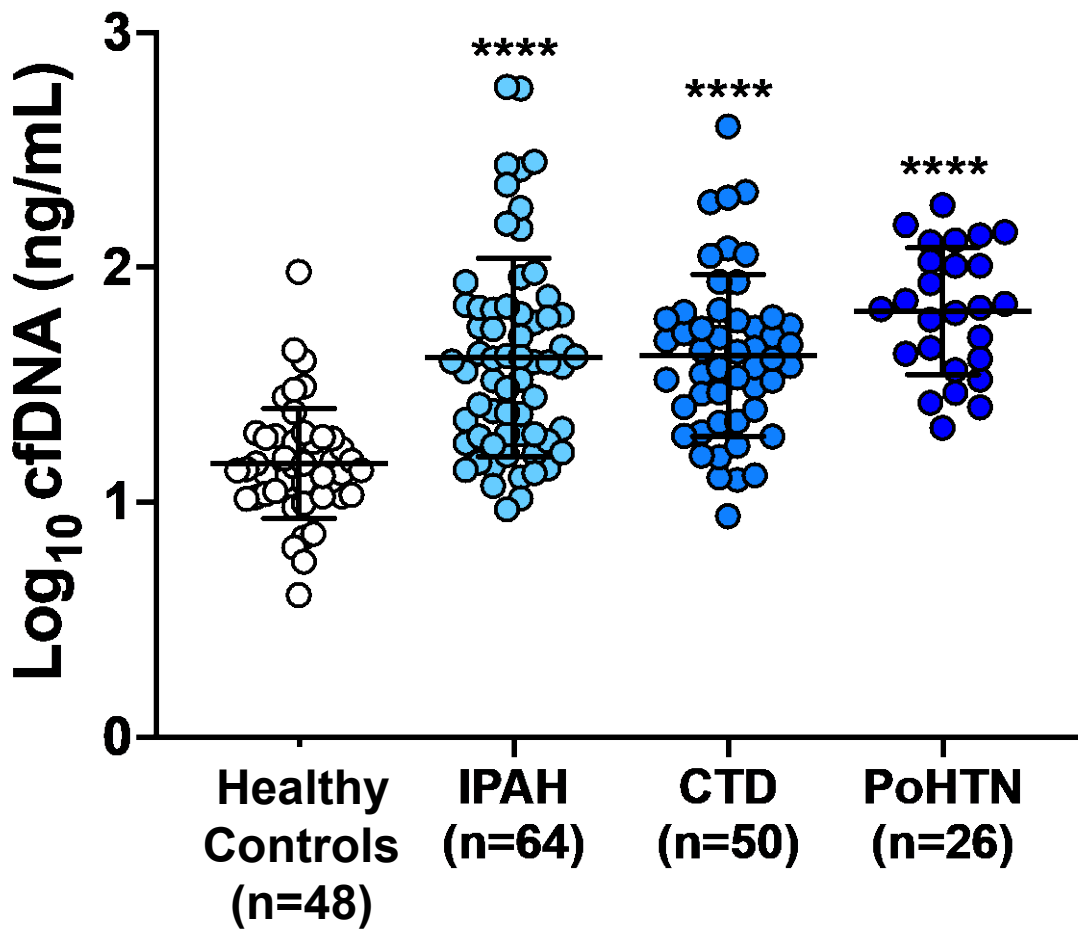

**Figure S1. Concentrations of cell-free DNA (cfDNA) in patients with idiopathic, connective tissue disease-associated and portal hypertension-associated pulmonary arterial hypertension (PAH) in Cohort B.** Patients with idiopathic PAH (IPAH), connective tissue disease-associated (CTD) and portal hypertension-associated (PoHTN) PAH had significantly higher cfDNA concentrations compared to healthy controls (ANOVA  $P < 0.0001$ ; \*\*\*\* $P < 0.0001$  for each pairwise comparison with healthy controls). cfDNA concentrations are displayed as mean  $\pm$  SD of  $\log_{10}$ -transformed values. PAH subtypes with less than 10 patients were not included in the subgroup analysis of cohort B. These included congenital heart disease-associated (n=9), heritable (n=2), drug/toxin-associated (n=4), and HIV-associated (n=3) PAH as well as pulmonary veno-occlusive disease (n=3).

**A**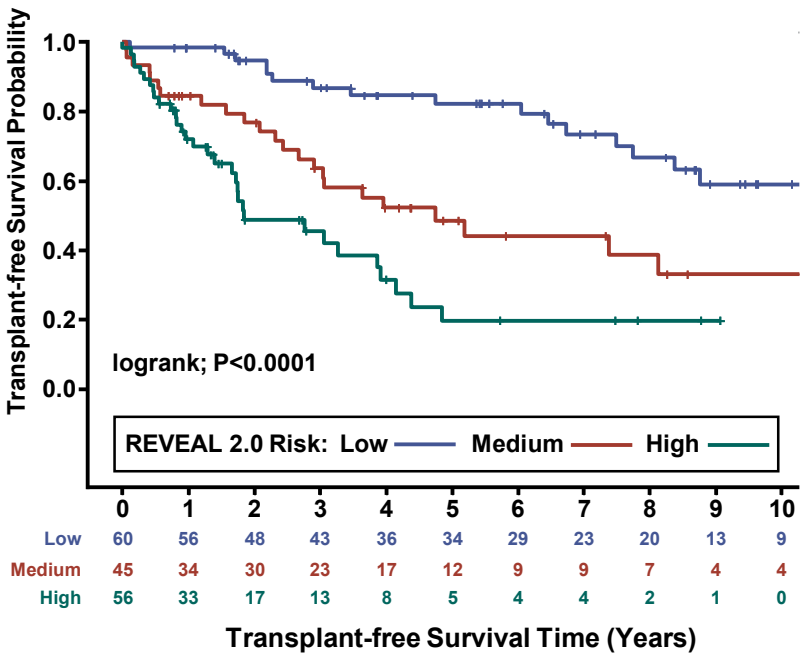**B**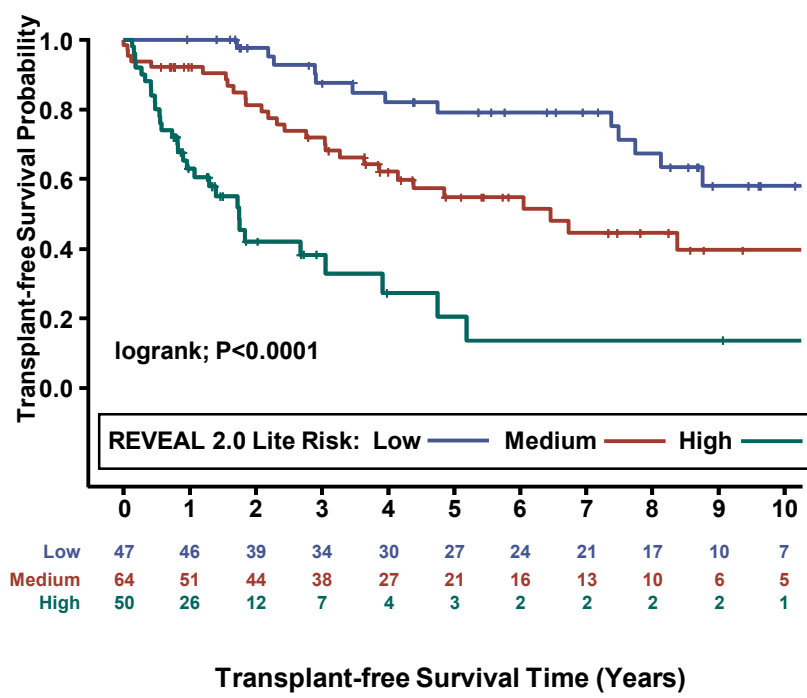

**Figure S2. REVEAL 2.0 and REVEAL Lite 2 risk scores predict transplant-free survival in pulmonary arterial hypertension (PAH) patients.** Kaplan-Meier analysis was performed with a median (IQR) follow up time of 2.7 (1.0-5.2) years. Patients were censored at the time of death or transplantation. A, Transplant-free survival was significantly different amongst REVEAL 2.0 risk groups (logrank; P<0.0001). Patients were grouped into low ( $\leq 6$ , blue line), medium (7-8, red line), and high risk ( $\geq 9$ , green line) categories. B, Transplant-free survival was also significantly different amongst REVEAL Lite 2 risk groups (logrank; P<0.0001). Patients were grouped into low ( $\leq 5$ , blue line), medium (6-7, red line), and high risk ( $\geq 8$ , green line) categories.

Table S1. Comparisons of demographics and comorbidities across cfDNA tertiles in Cohort B

| <b>Variable</b>                       | <b>P-value</b>    |
|---------------------------------------|-------------------|
| Gender                                | 0.07 <sup>†</sup> |
| PAH Etiology*                         | 0.01 <sup>‡</sup> |
| Hypertension                          | 0.86 <sup>†</sup> |
| Obstructive sleep apnea               | 0.84 <sup>†</sup> |
| Chronic obstructive pulmonary disease | 0.28 <sup>†</sup> |
| Interstitial lung disease             | 0.91 <sup>‡</sup> |
| Cancer                                | 0.40 <sup>†</sup> |
| Diabetes                              | 0.83 <sup>†</sup> |

\*Driven by differences in idiopathic, connective tissue disease-associated and portal hypertension-associated pulmonary arterial hypertension (PAH). Idiopathic PAH was enriched in cfDNA tertile 1 (n = 26 vs 19 vs 19), connective tissue disease-associated PAH was enriched in cfDNA tertile 2 (15 vs 22 vs 12), and portal hypertension-associated PAH was enriched in cfDNA tertile 3 (n = 3 vs 9 vs 15)

†Pearson's chi-square test p-value

‡Fisher's Exact test p-value

Table S2. Correlations between cfDNA and PAH clinical variables in Cohort A

| <b>Variable</b>      | <b>Spearman <math>\rho</math></b> | <b>P-value</b> |
|----------------------|-----------------------------------|----------------|
| Age                  | 0.15                              | 0.31           |
| Body mass index      | -0.05                             | 0.73           |
| REVEAL 2.0           | 0.39                              | 0.007          |
| REVEAL 2.0 Lite      | 0.40                              | 0.005          |
| mPAP (mmHg)          | -0.01                             | 0.96           |
| RAP (mmHg)           | 0.21                              | 0.16           |
| PAWP (mmHg)          | 0.27                              | 0.06           |
| PVR (Wood units)     | -0.02                             | 0.91           |
| Heart rate (bpm)     | 0.44                              | 0.007          |
| SBP (mmHg)           | 0.16                              | 0.29           |
| DLCO (% predicted)   | -0.13                             | 0.39           |
| 6MWD (meters)        | -0.26                             | 0.09           |
| NYHA                 | 0.37                              | 0.02           |
| NT-proBNP (pg/mL)    | 0.32                              | 0.03           |
| hs-Troponin T (ng/L) | 0.32                              | 0.10           |
| hs-CRP (mg/L)        | 0.21                              | 0.22           |
| Creatinine (mg/dL)   | 0.16                              | 0.29           |

Abbreviations: PAH, pulmonary arterial hypertension; cfDNA, cell-free DNA; REVEAL, Registry to Evaluate Early and Long-Term PAH Disease Management; mPAP, mean pulmonary artery pressure; RAP, right atrial pressure; PAWP, pulmonary artery wedge pressure; PVR, pulmonary vascular resistance; SBP, systolic blood pressure; DLCO, diffusing capacity of the lungs for carbon monoxide; 6MWD, six-minute walk distance; NYHA, New York Heart Association; NT-proBNP, N-terminal pro brain-type natriuretic peptide; hs, high-sensitivity; CRP, C-reactive protein.

Table S3. Correlations between cfDNA and PAH clinical variables in Cohort B

| <b>Variable</b>      | <b>Spearman <math>\rho</math></b> | <b>P-value</b> |
|----------------------|-----------------------------------|----------------|
| Age                  | 0.03                              | 0.75           |
| Body mass index      | 0.15                              | 0.07           |
| REVEAL 2.0           | 0.35                              | <0.0001        |
| REVEAL 2.0 Lite      | 0.22                              | 0.005          |
| mPAP (mmHg)          | 0.34                              | <0.0001        |
| RAP (mmHg)           | 0.18                              | 0.03           |
| PAWP (mmHg)          | 0.22                              | 0.005          |
| PVR (Wood units)     | 0.26                              | 0.0008         |
| Heart rate (bpm)     | 0.01                              | 0.95           |
| SBP (mmHg)           | 0.12                              | 0.13           |
| 6MWD (meters)        | -0.25                             | 0.004          |
| NYHA                 | 0.11                              | 0.15           |
| BNP (pg/mL)          | 0.40                              | <0.0001        |
| hs-Troponin T (ng/L) | 0.39                              | 0.0003         |
| hs-CRP (mg/L)        | 0.45                              | <0.0001        |
| Creatinine (mg/dL)   | 0.06                              | 0.49           |

Abbreviations: PAH, pulmonary arterial hypertension; cfDNA, cell-free DNA; REVEAL, Registry to Evaluate Early and Long-Term PAH Disease Management; mPAP, mean pulmonary artery pressure; RAP, right atrial pressure; PAWP, pulmonary artery wedge pressure; PVR, pulmonary vascular resistance; SBP, systolic blood pressure; 6MWD, six-minute walk distance; NYHA, New York Heart Association; BNP, brain-type natriuretic peptide; hs, high-sensitivity; CRP, C-reactive protein.
